# Supplementary material for: Neuroprotection Afforded by an Enriched Mediterranean-like Diet Is Modified by Exercise in a Rat Male Model of Cerebral Ischemia
Source: MDPI journal article supplement (doi:10.3390/antiox13020138), 2024-01-23

Supplementary information

Neuroprotection afforded by an enriched Mediterranean-like diet is modified by exercise in a rat model of cerebral ischemia

Supplementary figure with legend

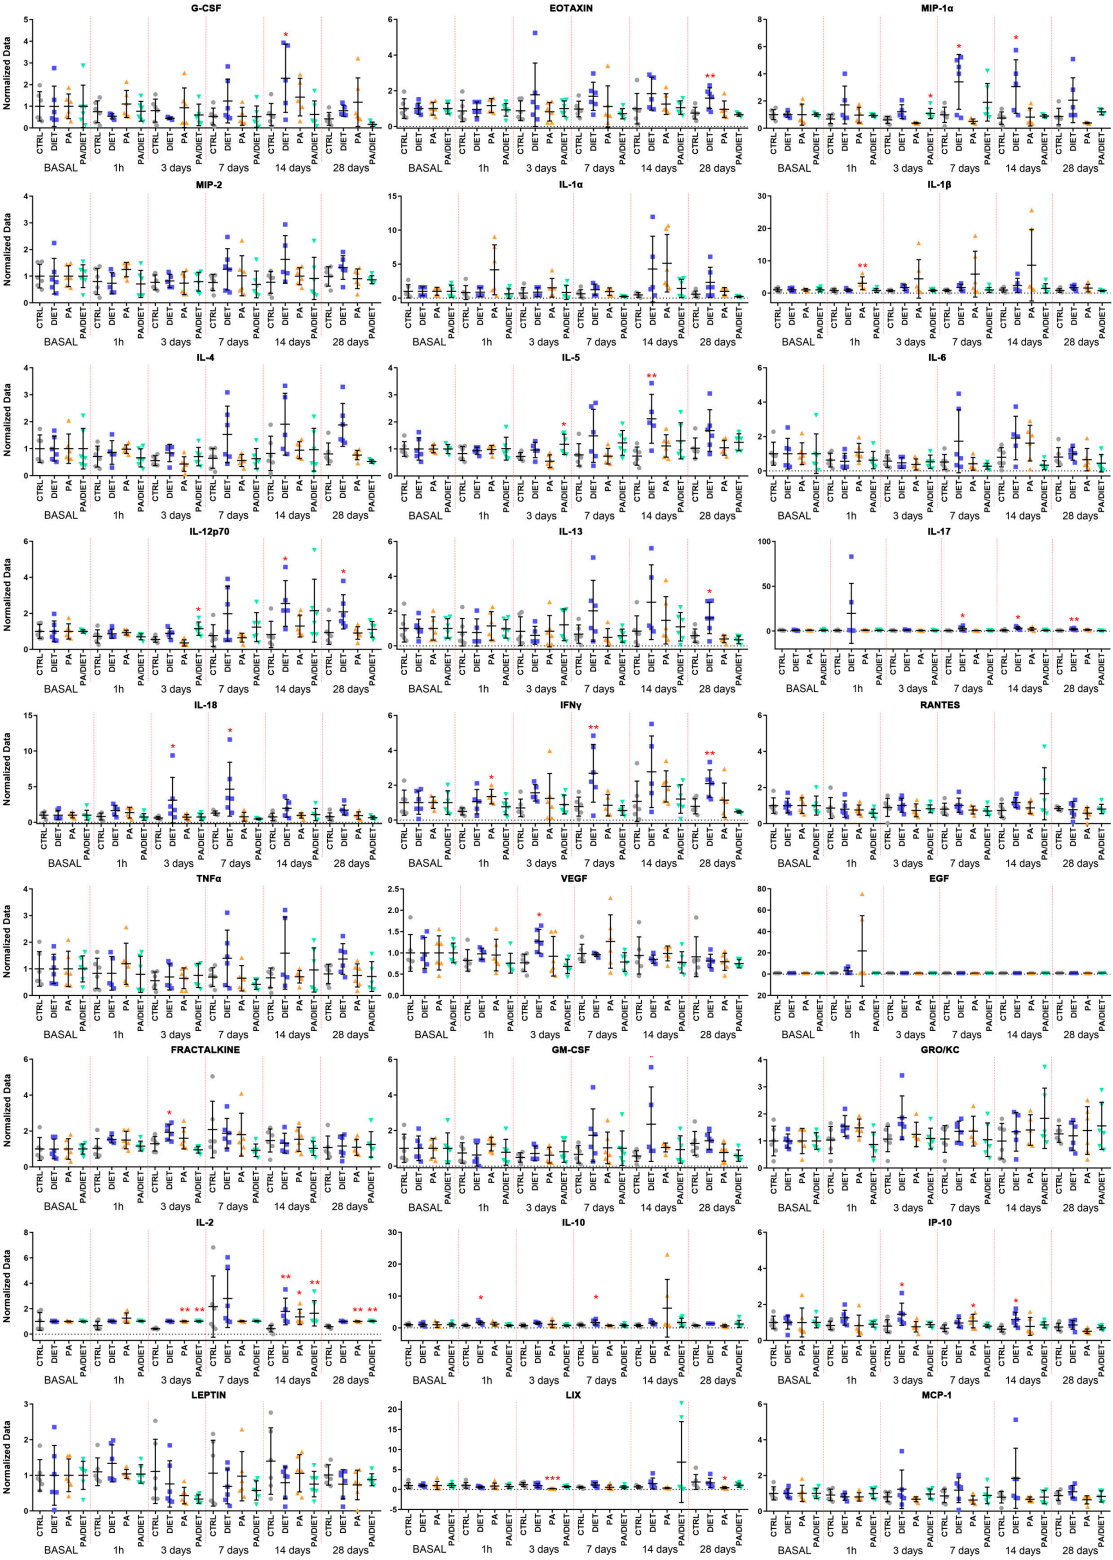

Supplement: s1 [file s1]
