# Supplementary material for: Neuroprotection Afforded by an Enriched Mediterranean-like Diet Is Modified by Exercise in a Rat Male Model of Cerebral Ischemia
Source: Antioxidants (Basel). 2024 Jan 23;13(2):138. doi: 10.3390/antiox13020138 (PMC10885962; doi:10.3390/antiox13020138)
Supplement: Supplementary file 1 [file antioxidants-13-00138-s001.zip › Supplementary Table S1.xlsx]

## Sheet: Raw Data
BASAL						1h					3 days					7 days					14 days					28 days
		CONCENTRATION (pg/mL)					CONCENTRATION (pg/mL)					CONCENTRATION (pg/mL)					CONCENTRATION (pg/mL)					CONCENTRATION (pg/mL)					CONCENTRATION (pg/mL)
CYTOKINE/CHEMOKINE		CTRL	DIET	PA	PA/DIET		CTRL	DIET	PA	PA/DIET		CTRL	DIET	PA	PA/DIET		CTRL	DIET	PA	PA/DIET		CTRL	DIET	PA	PA/DIET		CTRL	DIET	PA	PA/DIET
		n=6	n=6	n=6	n=6		n=6	n=6	n=6	n=6		n=6	n=6	n=6	n=6		n=6	n=6	n=6	n=6		n=6	n=6	n=6	n=6		n=6	n=6	n=6	n=6
G-CSF		165.4	26,6 ** (p=0.0169)	49.84	155.6		124.4	14,51 * (p=0.0158)	55.12	120.1		132.6	11,88 * (p=0.0155)	46.56	94.2		87.91	33.11	26.86	81.81		102.4	60.99	70.92	97.56		69.64	21.24	59.4	26.33
GM-CSF		263.3	91.19	124.4	113.3		194.2	68.76	153.7	87.83		128.6	65.09	76.35	91.46		172.9	157.6	127.5	114.1		148.9	215.1	124.8	105.8		335.4	129,8 ** (p=0.006)	94,47 ** (p=0.0015)	66,7 *** (p=0.0008)
VEGF		65.5	54.71	48.32	56.93		53.97	53.41	45.93	43.21		50.39	69.48	44.57	38.99		64.75	52.57	61.3	44.9		61.56	46.39	47.7	44.32		59.72	44.43	38.18	42.5
EOTAXIN		73.08	23,81 ** (p=0.0047)	42.67	60.87		63.43	22.82	49.93	56.83		64.32	42.17	35.08	60.86		71.47	40.25	47.82	43.49		72.8	43.72	53.56	64.18		54.71	37.71	41	40.26
LEPTIN		28715	29481	21276	35791		31538	39356	22131	37117		31889	22375	9140	11878		30448	20242	20772	20588		40247	23375	22474	26916		29026	22139	15519 * (p=0.0468)	31374
MIP-1α		24.78	4,966 ** (p=0.006)	11.22	4,718 ** (p=0.0035)		17.03	8.506	10.86	4,4 ** (p=0.0066)		15.28	6.052	4,3 ** (p=0.0018)	5,1 * (p=0.0153)		24.65	16.93	5,724 * (p=0.01)	9,005 * (p=0.026)		18.57	15.21	9.198	4,2 * (p=0.0262)		21.65	10.24	4,402 * (p=0.018)	5.71
MIP-2		242	115,3 * (p=0.0314)	142.8	159.2		192.4	84.76	178	113.2		185.8	94,68 * (p=0.0404)	105	126.9		184.4	145.2	145.1	110.2		186.6	188	142.7	146.3		239.7	152.8	128,8 * (p=0.0124)	138,2 * (p=0.0299)
IL-1α		694.4	61,01 ** (p=0.0055)	68,33 * (p=0.0156)	315.2		568.1	53.69	284.1	202		517.9	53,69 * (p=0.0155)	103.6	263		445.8	75.97	64.82	75.95		327.4	260.7	350.1	450.1		402.6	141	66,82 * (p=0.0471)	64,82 * (p=0.0352)
IL-1β		36.44	11,81* (p=0.0115)	14,75* (p=0.0494)	17.86		28.79	10.9	44.77	14.51		26.37	20.12	65.06	14.34		29.04	20.23	86.49	17.43		34.53	27.87	127.1	26.12		29.69	19.56	22.73	12.89
IL-2		64	26.18	25.98	25.98		43.36	26.38	32.77	26.38		27.36	26.38	26.18	26.18		138.7	73.33	26,38 ** (p=0.025)	26,38 ** (p=0.025)		33.36	46.58	35.23	42.53		37.98	25,98 * (p=0.0181)	25,98 * (p=0.0181)	26.38
IL-4		241.7	60,2 ** (p=0.0021)	130	142.4		170.7	51,67 ** (p=0.0068)	127.5	94.1		134.3	50,49 ** (p=0.006)	56,04 ** (p=0.0071)	99.81		154.5	92.03	72.98	89.36		199.9	114.9	122.9	136.8		194.3	113	99.24	74,6 ** (p=0.0013)
IL-5		214.8	86,78 **** (p <0.0001)	141,7 ** (p=0.0055)	99,21 *** (p=0.0002)		178.8	81,03 ** (p=0.0013)	138.8	100,5 ** (p=0.006)		155.5	83,35 ** (p=0.0036)	78,21 ** (p=0.0013)	116.3		168	129.1	104.2	121.6		158.6	183.4	158	129.1		220.5	145.8	148.4	123,6 * (p=0.0386)
IL-6		3135	506,4 ** (p=0.0075)	1197	5036		1978	282,6 * (p=0.0193)	1298	3148		1780	236,6 * (p=0.0186)	445.5	2684		1616	874.1	494.5	1392		2489	968.5	1935	1681		2521	505.4	783.7	2258
IL-10		78.48	34.79	59.42	55.03		60.17	56.3	71.35	40.99		58.35	51.78	67.14	39.41		72.59	59.39	44.05	40.53		59.22	52.7	367	91.47		58.62	46.77	37.45	67.74
IL-12p70		639	168,9 *** (p =0.0002)	332,9** (p=0.0098)	227,8 ** (p=0.0022)		461.7	147 ** (p=0.0082)	309.4	160,7 * (p=0.0199)		353.1	151 * (p=0.0138)	120,7 ** (p=0.0018)	262.1		489.9	334.3	217.1	282.1		529.1	431	430.9	491.1		599.8	353	303.4	253.8
IL-13		242.6	37,18 * (p=0.0158)	112.1	190.4		190.2	28.72	128.6	185.9		202.4	22,52 * (p=0.0386)	94.24	230.2		163.4	74.98	54.62	111.6		205.6	93.41	164.2	209		142.8	59.5	44,12 * (p=0.0278)	66.42
IL-17		162	27,5 ** (p=0.0023)	74,12 * (p=0.0362)	110.2		127.8	544.7	81.52	95.31		127.1	34,23 * (p=0.0145)	52,7* (p=0.0289)	66.68		97.53	74.56	49.27	64.52		151.5	92.2	172.4	95.36		111	58.33	108.4	44,2 * (p=0.0257)
IL-18		153.2	46,22 ** (p=0.0086)	74.65	76.12		122.8	75.98	100.7	57.05		92.67	143.2	54.15	56.91		198.2	214.7	57.62	35,13* (p=0.0497)		115.7	90.51	71.2	82.8		120.1	79.01	70.6	49,33 * (p=0.0436)
IFNγ		753.1	116,9 ** (p=0.0091)	235,8 * (p=0.0457)	479.5		374.2	122,9 * (p=0.0481)	317.2	367.4		525.9	182.6	292.1	426.9		581.9	313.7	201	265.1		809.9	323.8	455.5	579.9		595	245,5 * (p=0.0262)	268,8 * (p=0.0392)	225 * (p=0.0248)
IP-10		264	172.1	283.4	215.8		219.5	215.8	233.5	195.4		211.4	250.6	215.2	188.9		179.3	167	305,4 ** (p=0.0078)	173		166.6	199.9	221.5	187		197.7	148.6	144.9	152.8
TNFα		44.86	17.53	26.21	26.73		37.43	14.63	31.25	21.4		25.18	12.2	17	20.26		31.11	24.51	17.04	11.29		29.84	27.86	18.51	25.73		36.31	24.05	19.8	19.15
EGF		0.48	0.48	0.48	0.48		0.48	1.482	10.45	0.48		0.48	0.48	0.48	0.48		0.48	0.48	0.48	0.48		0.48	0.48	0.48	0.48		0.48	0.48	0.48	0.48
MCP-1		1256	790.3	1186	867.3		1143	637,3 * (p=0.0251)	949.7	861.5		1009	973.9	794.3	836		1073	931	743.4	766.5		988.3	1460	796.4	688.9		1092	863.6	758	721.8
GRO/KC		211	169.3	170.8	200.6		218.5	262.9	253.9	174.4		226.4	315	212.8	218.5		226.5	230	232.8	210.2		210.4	227	240.9	368.8		266	202	236.8	312.8
LIX		701.7	479.4	1476	942.2		729.3	293.8	1283	714		862.9	469.9	313 ** (p=0.005)	659		396	547.8	844.5	546.5		466	719.4	555.9	6461		1314	786.6	660.4	1014
RANTES		414.4	346.8	415.6	458.9		358.9	277.9	314.8	265.8		372.1	351.4	304.9	376.3		332.2	351.2	313	323.4		304.2	404.6	362.7	759.2		342.3	267.6	240	370.5
FRACTALKINE		37.09	30.85	25.51	31.86		38.43	47.27	38.22	37.1		47.9	59.38	40.79	30.38		77.24	57.72	45.88	29,49 * (p=0.0341)		54.61	40.89	39.37	33.04		40.09	36.06	27.96	39.94
		Statistical significance level

## Sheet: Normalized Data
BASAL						1h					3 days					7 days					14 days					28 days
		CONCENTRATION (pg/mL)					CONCENTRATION (pg/mL)					CONCENTRATION (pg/mL)					CONCENTRATION (pg/mL)					CONCENTRATION (pg/mL)					CONCENTRATION (pg/mL)
CYTOKINE/CHEMOKINE		CTRL	DIET	PA	PA/DIET		CTRL	DIET	PA	PA/DIET		CTRL	DIET	PA	PA/DIET		CTRL	DIET	PA	PA/DIET		CTRL	DIET	PA	PA/DIET		CTRL	DIET	PA	PA/DIET
		n=6	n=6	n=6	n=6		n=6	n=6	n=6	n=6		n=6	n=6	n=6	n=6		n=6	n=6	n=6	n=6		n=6	n=6	n=6	n=6		n=6	n=6	n=6	n=6
G-CSF		1	1	1	1		0.7517	0.544	1.107	0.7717		0.8017	0.448	0.935	0.604		0.5317	1.245	0.54	0.525		0.62	2,292* (p=0.0247)	1.424	0.6267		0.4217	0.798	1.19	0.17
GM-CSF		1	1	1	1		0.7383	0.6267	1.235	0.7767		0.4883	0.712	0.6133	0.8083		0.6583	1.73	1.025	1.007		0.5667	2,36* (p=0.0363)	1.046	0.9317		1.277	1.422	0.7617	0.588
VEGF		1	1	1	1		0.825	0.978	0.95	0.76		0.7683	1,273* (p=0.0229)	0.9217	0.685		0.9883	0.96	1.267	0.7867		0.94	0.85	0.9883	0.7783		0.91	0.8117	0.7917	0.748
EOTAXIN		1	1	1	1		0.8667	0.956	1.17	0.9317		0.88	1.772	0.8233	1		0.9767	1.69	1.122	0.7133		0.995	1.838	1.255	1.053		0.7467	1,583** (p=0.0074)	0.96	0.662
LEPTIN		1	1	1	1		1.098	1.335	1.04	1.037		1.11	0.7583	0.4317	0.3333		1.06	0.6883	0.975	0.575		1.4	0.7933	1.057	0.7533		1.01	0.7517	0.73	0.8767
MIP-1α		1	1	1	1		0.6867	1.716	0.9683	0.936		0.6167	1.22	0.385	1,083* (p=0.0444)		0.9933	3,412* (p=0.0114)	0.512	1.91		0.7483	3,064* (p=0.024)	0.8217	0.894		0.87	2.062	0.394	1.21
MIP-2		1	1	1	1		0.7967	0.736	1.248	0.7083		0.7667	0.822	0.7383	0.795		0.7617	1.258	1.017	0.6917		0.77	1.63	1	0.9167		0.9917	1.325	0.9033	0.866
IL-1α		1	1	1	1		0.82	0.88	4.158	0.6417		0.7467	0.88	1.518	0.835		0.6417	1.246	0.95	0.24		0.474	4.272	5.127	1.427		0.5817	2.312	0.98	0.206
IL-1β		1	1	1	1		0.7917	0.922	3,034** (p=0.0058)	0.815		0.7233	1.704	4.41	0.8033		0.7967	1.712	5.863	0.975		0.945	2.358	8.62	1.463		0.815	1.657	1.54	0.722
IL-2		1	1	1	1		0.675	1.008	1.263	1.018		0.425	1.008	1,01** (p=0.0034)	1,01** (p=0.0034)		2.168	2.802	1.018	1.018		0.4317	1,782** (p=0.0092)	1,357* (p=0.0272)	1,64** (p=0.0046)		0.592	0.992	1,002** (p=0.0099)	1,018** (p=0.0027)
IL-4		1	1	1	1		0.7083	0.86	0.98	0.66		0.5567	0.84	0.43	0.705		0.64	1.528	0.562	0.63		0.8267	1.908	0.945	0.9617		0.8067	1.88	0.7633	0.526
IL-5		1	1	1	1		0.8317	0.936	0.98	1.012		0.725	0.962	0.55	1,173* (p=0.0252)		0.7833	1.487	0.734	1.225		0.7367	2,114** (p=0.0035)	1.113	1.302		1.028	1.68	1.047	1.246
IL-6		1	1	1	1		0.63	0.56	1.083	0.6267		0.5683	0.468	0.374	0.532		0.5167	1.728	0.414	0.276		0.7933	1.912	1.615	0.334		0.805	0.996	0.6533	0.4483
IL-10		1	1	1	1		0.7667	1,618* (p=0.0103)	1.202	0.7433		0.7433	1.488	1.128	0.715		0.9233	1,707* (p=0.0375)	0.74	0.7367		0.755	1.514	6.177	1.662		0.746	1.344	0.6283	1.228
IL-12p70		1	1	1	1		0.7233	0.87	0.9317	0.704		0.5517	0.894	0.3617	1,152* (p=0.0453)		0.7667	1.98	0.652	1.238		0.8283	2,55* (p=0.011)	1.297	2.153		0.9383	2,088* (p=0.0169)	0.9133	1.114
IL-13		1	1	1	1		0.785	0.77	1.147	0.9783		0.8367	0.604	0.8433	1.208		0.675	2.015	0.488	0.585		0.8467	2.51	1.467	1.097		0.5883	1,6* (p=0.0116)	0.396	0.348
IL-17		1	1	1	1		0.7867	19.81	1.1	0.8633		0.7833	1.245	0.7117	0.604		0.6017	2,713* (p=0.0125)	0.666	0.5883		0.9333	3,354* (p=0.0121)	2.327	0.865		0.685	2,123** (p=0.0018)	1.463	0.402
IL-18		1	1	1	1		0.8033	1.644	1.35	0.7467		0.605	3,095* (p=0.0283)	0.7233	0.7467		1.294	4,643* (p=0.0421)	0.77	0.46		0.7583	1.958	0.955	1.087		0.785	1.71	0.945	0.648
IFNγ		1	1	1	1		0.496	1.052	1,346* (p=0.0303)	0.765		0.6983	1.564	1.238	0.89		0.7717	2,683** (p=0.0067)	0.852	0.5533		1.075	2.77	1.932	1.208		0.79	2,098** (p=0.0097)	1.138	0.47
IP-10		1	1	1	1		0.8333	1.257	0.8233	0.9067		0.8	1,457* (p=0.0429)	0.76	0.875		0.6783	0.97	1,078* (p=0.0281)	0.8		0.6283	1,162* (p=0.0341)	0.7817	0.8667		0.7483	0.8633	0.5117	0.7067
TNFα		1	1	1	1		0.835	0.834	1.193	0.8		0.56	0.698	0.6483	0.7567		0.6933	1.4	0.65	0.422		0.6633	1.592	0.705	0.9617		0.81	1.373	0.755	0.714
EGF		1	1	1	1		1	3.088	21.76	1		1	1	1	1		1	1	1	1		1	1	1	1		1	1	1	1
MCP-1		1	1	1	1		0.9083	0.806	0.8	0.9933		0.8017	1.23	0.67	0.9633		0.8567	1.177	0.628	0.8833		0.7867	1.843	0.6683	0.7933		0.8717	1.092	0.6417	0.83
GRO/KC		1	1	1	1		1.035	1.552	1.486	0.87		1.073	1.86	1.244	1.09		1.075	1.357	1.364	1.048		0.9967	1.34	1.408	1.838		1.26	1.192	1.387	1.56
LIX		1	1	1	1		1.038	0.612	0.87	0.7583		1.23	0.98	0,21*** (p=0.0005)	0.7		0.562	1.142	0.5717	0.58		0.664	1.498	0.3767	6.855		1.872	1.64	0,4483* (p=0.0239)	1.077
RANTES		1	1	1	1		0.865	0.8017	0.7583	0.58		0.8983	1.015	0.7333	0.82		0.8017	1.013	0.754	0.7033		0.7333	1.167	0.8733	1.655		0.826	0.77	0.5783	0.8083
FRACTALKINE		1	1	1	1		1.037	1.534	1.498	1.163		1.29	1,925* (p=0.046)	1.597	0.955		2.082	1.872	1.798	0.9267		1.472	1.324	1.542	1.038		1.082	1.17	1.097	1.255
		Statistical significance level
