# Supplementary material for: Neuroprotection Afforded by an Enriched Mediterranean-like Diet Is Modified by Exercise in a Rat Male Model of Cerebral Ischemia
Source: Antioxidants (Basel). 2024 Jan 23;13(2):138. doi: 10.3390/antiox13020138 (PMC10885962; doi:10.3390/antiox13020138)
Supplement: Supplementary file 1 [file antioxidants-13-00138-s001.zip › Supplementary Table S2.xlsx]

## Sheet: Raw Data
BASAL						1h					3 days					7 days					14 days					28 days
		NUMBERS					NUMBERS					NUMBERS					NUMBERS					NUMBERS					NUMBERS
CELLS		CTRL	DIET	EXER	BOTH		CTRL	DIET	EXER	BOTH		CTRL	DIET	EXER	BOTH		CTRL	DIET	EXER	BOTH		CTRL	DIET	EXER	BOTH		CTRL	DIET	EXER	BOTH
		n=10	n=10	n=10	n=10		n=10	n=10	n=10	n=10		n=10	n=10	n=10	n=10		n=10	n=10	n=10	n=10		n=10	n=10	n=10	n=10		n=7	n=7	n=7	n=7
CD34+		58.4	64.45	40.6	26.4		27.44	119.5	26.7	20.9		34.5	35.82	21.8	106.9		203.1	56.3	85.3	16.6		52	37.45	34.4	36.89		15.43	13	10.71	13.86
HCs		53.4	62	33.9	23.3		22.67	115.2	20.9	17.3		30.6	33	19.4	102.5		196.9	52	71.3	14.1		49.1	35.09	32	32.56		10.57	18.57	8	9.143
EPCs		6.2	1,818 * (p=0.0291)	3.9	2.9		2.111	4.636	2.9	1.7		4.9	2.545	2	7.5		6.6	6	3.9	1.8		4.5	2.909	5	4.556		3.857	4.143	1.429	2.714
		Statistical significance level

## Sheet: Normalized Data
BASAL						1h					3 days					7 days					14 days					28 days
		NUMBERS					NUMBERS					NUMBERS					NUMBERS					NUMBERS					NUMBERS
CELLS		CTRL	DIET	EXER	BOTH		CTRL	DIET	EXER	BOTH		CTRL	DIET	EXER	BOTH		CTRL	DIET	EXER	BOTH		CTRL	DIET	EXER	BOTH		CTRL	DIET	EXER	BOTH
		n=10	n=10	n=10	n=10		n=10	n=10	n=10	n=10		n=10	n=10	n=10	n=10		n=10	n=10	n=10	n=10		n=10	n=10	n=10	n=10		n=7	n=7	n=7	n=7
CD34+		1	1	1	1		0.4711	1.852	0.657	0.79		0.59	0.5573	0.536	4.05		3.476	0.873	2.101	0.63		0.891	0.5809	0.848	1.398		0.2629	0.2029	0.2629	0.5243
HCs		1	1	1	1		0.4233	1.856	0.619	0.742		0.573	0.5336	0.573	4.397		3.69	0.839	2.104	0.606		0.918	0.5664	0.943	1.397		0.1971	0.3	0.2371	0.3943
EPCs		1	1	1	1		0.3405	2,55* (p=0.0122)	0.7436	0.5862		0.7903	1.4	0.5128	2.586		1.065	3.3	1	0.6207		0.7258	1.6	1.282	1.571		0.6221	2.279	0.3663	0.936
		Statistical significance level
